# Supplementary material for: DNA reusability and optoelectronic characteristics of streptavidin-conjugated DNA crystals on a quartz substrate
Source: Royal Society of Chemistry journal article supplement (doi:10.1039/c5ra02924d), 2015-01-01
Supplement: c5ra02924d1.pdf [file c5ra02924d1.pdf]

## Electronic Supplementary Information

# DNA Reusability and Optoelectronic Characteristics of Streptavidin-Conjugated DNA Crystals on a Quartz Substrate†

5 Bramaramba Gnapareddy,<sup>‡a,b</sup> Taewoo Ha,<sup>‡c</sup> Sreekantha Reddy Dugasani,<sup>‡a,b</sup> Jang Ah Kim,<sup>a,d</sup>  
Byeonghoon Kim,<sup>a,b</sup> Taesung Kim,<sup>\*a,d</sup> Jae Hoon Kim,<sup>\*c</sup> and Sung Ha Park<sup>\*a,b</sup>

<sup>a</sup>Sungkyunkwan Advanced Institute of Nanotechnology (SAINT),  
Sungkyunkwan University, Suwon 440-746, Korea

10 <sup>b</sup>Department of Physics, Sungkyunkwan University, Suwon 440-746, Korea.

<sup>c</sup>Department of Physics, Yonsei University, Seoul, 120-749, Korea.

<sup>d</sup>School of Mechanical Engineering, Sungkyunkwan University, Suwon 440-746, Korea.

‡ These authors contributed equally to this work.

15

## Materials and Methods

**O<sub>2</sub> Plasma Exposure.** The treatment of oxygen (O<sub>2</sub>) plasma on quartz changes the surface properties from hydrophobic to hydrophilic. The O<sub>2</sub> plasma cleaner (Femto Science, Model: Cute) was used in the present study.  
20 The chamber was evacuated and then the oxygen plasma cleaning process commenced at a power of 50 W, base pressure of  $5 \times 10^{-2}$  torr, oxygen flow rate 45 sccm, working oxygen pressure  $\sim 7.8 \times 10^{-1}$  torr, and plasma generation time 10 min.

**DNA Crystal Growth on a Quartz Substrate.** Synthetic oligonucleotides of DNA, purified by high performance liquid chromatography (HPLC), were purchased from BIONEER (Daejeon, Korea). The  
25 complexes were formed by mixing a  $1 \times$  TAE/Mg<sup>2+</sup> (40 mM Tris base, 20 mM acetic acid, 1 mM EDTA (pH 8.0), and 12.5 mM magnesium acetate) buffer solution which contains an equimolar mixture of 8 different DX strands. For annealing, the O<sub>2</sub> plasma treated quartz substrate along with the DNA strands were inserted into an AXYGEN-tube with a total sample volume of 250  $\mu$ L which was then placed in a styrofoam box with 2L of boiling water and cooled slowly from 95 to 25°C over a period of 24 hours to facilitate the hybridization  
30 process. During the annealing process, the DX strands formed DX crystals on a given substrate and consequently these crystals completely covered the quartz substrate. We prepared the sample with a concentration of 50 nM, which was well above the saturation concentration of 10 nM for the full coverage of DX crystals.

**Streptavidin binding to DXB crystals.** Biotinylated oligos were purchased from BIONEER (Daejeon, Korea).  
35 Streptavidin was purchased from Rockland Inc. (PA, USA). A 200 nM solution of streptavidin was prepared in

deionized water. A 1:1 ratio of streptavidin-DXB was prepared by directly pipetting streptavidin solution in the test tube.

**AFM imaging and Raman spectra.** For AFM imaging, a substrate assisted grown sample was placed on a metal puck using instant glue. 30  $\mu\text{L}$   $1\times$  TAE/ $\text{Mg}^{2+}$  buffer was added onto the substrate and another 10  $\mu\text{L}$  of  $1\times$  5 TAE/ $\text{Mg}^{2+}$  buffer was dispensed into the silicon nitride AFM tip (Veeco Inc., USA). AFM images were obtained by a Multimode Nanoscope (Veeco Inc., USA) in the fluid tapping mode. Before measuring the Raman spectra, the samples were rinsed with deionized water, followed by gentle blowing with nitrogen gas to remove chemical residues on the surface. The measurements were performed at room temperature with a confocal Raman microscope (WITec, alpha 300 R) at 532 nm.

**10 Electrical Measurement.** The electrical properties of DNA, DXB, and DXB+SA crystals were measured with a semiconductor parameter analyzer (4200-SCS, Keithley Instruments Inc., USA). To prepare the device, the samples were gently rinsed with deionized water and allowed to dry naturally. Then, the silver paste was deposited on the DNA crystal surface to define the metal contact with a channel length of  $\sim 1$  mm.

**Optical Measurement.** Optical transmission measurements in the near-infrared (NIR), visible (Vis), and 15 ultraviolet (UV) regions (3300  $\sim$  175 nm) were carried out with a spectrophotometer (Varian Cary 5G). The spectrophotometer is equipped with two light sources: a deuterium arc lamp (NIR and Vis) and a quartz W-halogen lamp (UV). It employs two detectors: a cooled PbS detector for the NIR region and a photomultiplier tube for the Vis and UV regions. The spectrophotometer measures the frequency-dependent light intensity passing either through the vacuum or through a sample. The present experiment used wavelengths of 1200 nm to 190 nm.

Fig. S1. Sequence map of the double-crossover (DX) tiles.

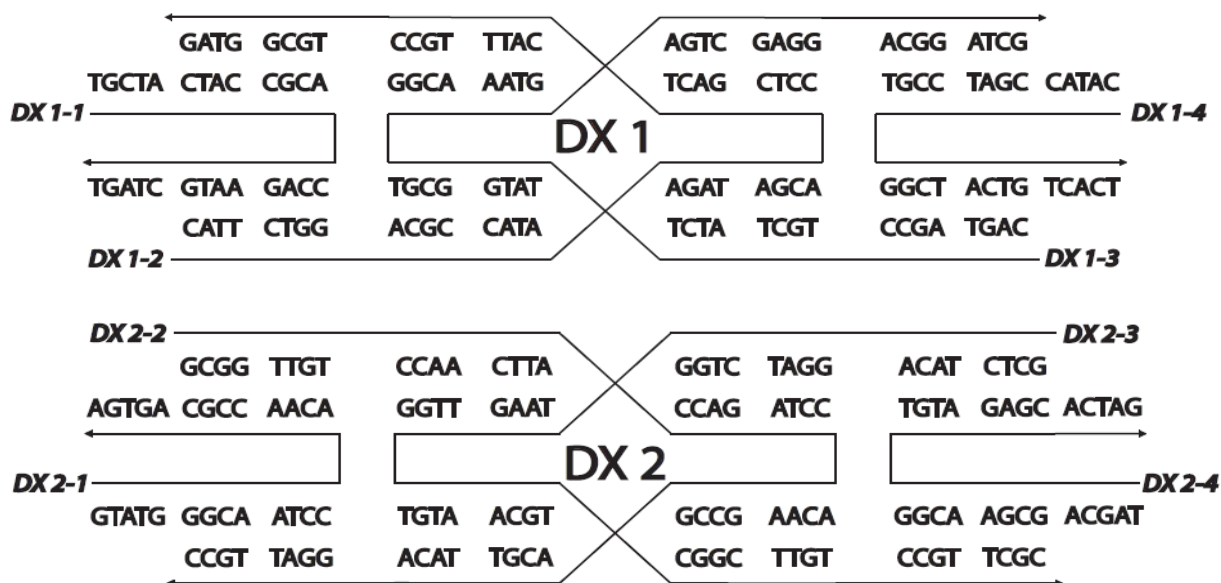

5 Table S1. Sequence pool for the double-crossover (DX) tiles

| Strand Name | Number of Nucleotides | Sequence (5' to 3')                                      |
|-------------|-----------------------|----------------------------------------------------------|
| DX1-1       | 26                    | TGCTA CTACCGCA CCAGAATG CTAGT                            |
| DX1-2       | 48                    | CATTCTGG ACGCCATA AGATAGCA CCTCGACT<br>CATTGCC TGCGGTAG  |
| DX1-3       | 48                    | CAGTAGCC TGCTATCT TATGGCGT GGCAAATG<br>AGTCGAGG ACGGATCG |
| DX1-4       | 26                    | CATAAC CGATCCGT GGCTACTG TCACT                           |
| DX2-1       | 26                    | GTATG GGCAATCC ACAACCGC AGTGA                            |
| DX2-2       | 48                    | GCGGTTGT CCAACTTA CCAGATCC ACAAGCCG<br>ACGTTACA GGATTGCC |
| DX2-3       | 48                    | GCTCTACA GGATCTGG TAAGTTGG TGTAACGT<br>CGGCTTGT CCGTTCGC |
| DX2-4       | 26                    | TAGCA GCGAACGG TGTAAGAGC ACTAG                           |

**Fig. S2.** Sequence map of the DX-biotin (DXB) tiles.

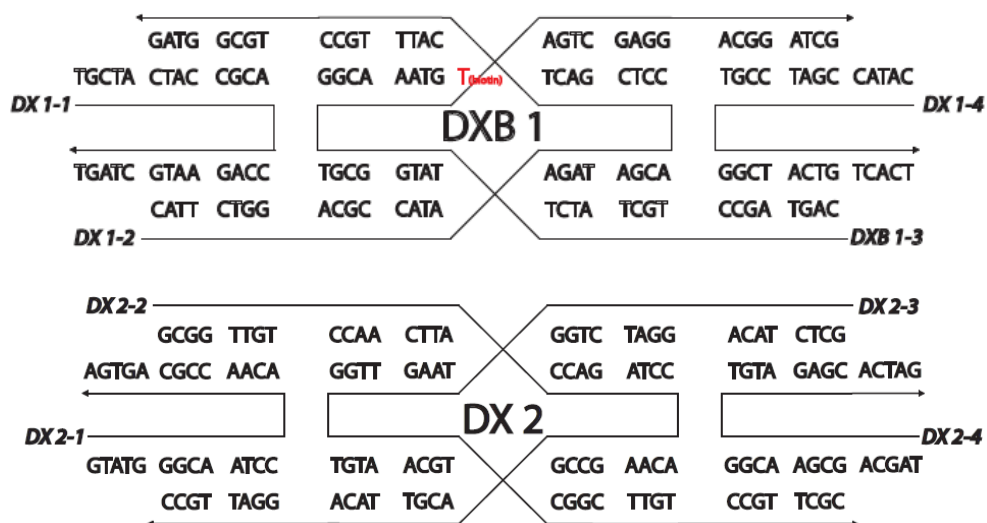

5

**Table S2.** Sequence pool for the DX-biotin (DXB) tiles.

| Strand Name   | Number of Nucleotides | Sequence (5' to 3')                                              |
|---------------|-----------------------|------------------------------------------------------------------|
| <b>DX1-1</b>  | 26                    | TGCTA CTACCGCA CCAGAATG CTAGT                                    |
| <b>DX1-2</b>  | 48                    | CATTCTGG ACGCCATA AGATAGCA CCTCGACT CATTGCC<br>TGCGGTAG          |
| <b>DXB1-3</b> | 48                    | CAGTAGCC TGCTATCT TATGGCGT GGCAAATG/ibiodT/<br>AGTCGAGG ACGGATCG |
| <b>DX1-4</b>  | 26                    | CATA CCGATCCGT GGCTACTG TCACT                                    |
| <b>DX2-1</b>  | 26                    | GTATG GGCAATCC ACAACCGC AGTGA                                    |
| <b>DX2-2</b>  | 48                    | GCGGTTGT CCAACTTA CCAGATCC ACAAGCCG ACGTTACA<br>GGATTGCC         |
| <b>DX2-3</b>  | 48                    | GCTCTACA GGATCTGG TAAGTTGG TGTAACGT CGGCTTGT<br>CCGTTCGC         |
| <b>DX2-4</b>  | 26                    | TAGCA GCGAACGG TGTA GAGC ACTAG                                   |

**Calculation of reusable DNA strand amount:**

- 5 ● The size of the substrate:  $5 \times 5 \text{ mm}^2$
- The dimension of unit DX tile: 12 nm (length)  $\times$  4 nm (width)
  - Effective dimension of single DX tile (due to electrostatic repulsion force among backbones): 12 nm (length)  $\times$  6 nm (width)
  - One substrate has two surface sides.
- 10 ● Single side of the substrate can be covered with N (length)  $\times$  M (width) tiles.
- $$N = 5 \text{ mm} / 6 \text{ nm} = 5 \times 10^{-3} / 6 \times 10^{-9} = 8.33 \times 10^5 \text{ tiles}$$
- $$M = 5 \text{ mm} / 12 \text{ nm} = 5 \times 10^{-3} / 12 \times 10^{-9} = 4.17 \times 10^5 \text{ tiles}$$
- Total number of tiles for covering one side: N (length)  $\times$  M (width) =  $3.47 \times 10^{11}$  tiles/side
  - Total number of tiles for covering two sides:  $2 \times$  N (length)  $\times$  M (width)
- 15 =  $2 \times 3.47 \times 10^{11}$  tiles/two sides =  $6.94 \times 10^{11}$  tiles/two sides =  $\sim 7 \times 10^{11}$  tiles/two sides
- $$= \sim 7 \times 10^{11} \text{ tiles/substrate}$$
- The sample with a 10 nM concentration of DNA has the following number of DNA strands:
 
$$= 10 \times 10^{-9} \times \text{Avogadro \#} / L = 10 \times 10^{-9} \times 6.023 \times 10^{23} \text{ strands/L} = 6.023 \times 10^{15} \text{ strands/L}$$

$$= 6.023 \times 10^9 \text{ strands /}\mu\text{L}$$
- 20 ● Total DNA volume in single test tube: 250  $\mu\text{L}$ /test tube
- Total number of DNA strands in one test tube:
 
$$\frac{6.023 \times 10^9 \text{ strands}}{250 \mu\text{L}} \times 250 \mu\text{L} = \frac{1.506 \times 10^{12} \text{ strands}}{1 \text{ test tube}}$$
- A total of eight kinds of DNA strands were used for constructing DX lattices which has two types of DX tiles.
- 25 For DX-1 tile,  $\frac{1.506 \times 10^{12} \text{ tiles}}{1 \text{ test tube}}$  exist
- For DX-2 tile,  $\frac{1.506 \times 10^{12} \text{ tiles}}{1 \text{ test tube}}$  exist
- Total number of DX tiles in a test tube (10 nM, 250  $\mu\text{L}$ );
 
$$= 2 \times 1.506 \times 10^{12} \text{ tiles/test tube} = 3.012 \times 10^{12} \text{ tiles/test tube}$$

$$= \sim 30 \times 10^{11} \text{ tiles in a test tube}$$
- 30 ● Total number of times for full coverage of one substrate (both sides) with DX tile:

$$\frac{30 \times 10^{11} \text{ tiles}}{1 \text{ test tube}} \times \frac{1 \text{ substrate}}{7 \times 10^{11} \text{ tiles}} = \frac{4.29 \text{ substrate}}{1 \text{ test tube}}$$

⇒ 250 μL of one test tube [10 nM] can cover ~4 substrates. (~4 times available)

- Therefore ~2.3 nM of DNA are needed for full coverage on a given substrate.
